# Supplementary material
Source: PubMed Central journal article supplement (PMC4875511)
Supplement: 13238_2013_3031_MOESM1_ESM.pdf [file 13238_2013_3031_MOESM1_ESM.pdf]

**Table S1 Primers used in molecular cloning and mutagenesis**

|                            | Forward primer                        | Reverse primer                        |
|----------------------------|---------------------------------------|---------------------------------------|
| ACP6 (33-428aa)            | 5'-cctgggatccGAGCTGCAGGAGGCCGATGG-3'  | 5'-gccgctcgagTTACTCTTCATTCCAACCTT-3'  |
| R58A                       | 5'-GTGTTTgcaCACGGGGCTCGGAGTCCTCTC-3'  | 5'-GACCTGCACCATTTTCAACTTCAGCAGGCT-3'  |
| H59A                       | 5'-GTCGTGTTTTCGagccGGGGCTCGGAGTCCT-3' | 5'-CTGCACCATTTTCAACTTCAGCAGGCTGCG-3'  |
| R62A                       | 5'-GGGGCTgcgAGTCCTCTCAAGCCGCTCCCG-3'  | 5'-GTGTCGAAACACGACCTGCACCATTTTCAA-3'  |
| R168A                      | 5'-ATTTTTgcaAATCTGGAGTCCACCCGTTGT-3'  | 5'-GTTAGTGGAACGAATAAGACCTCCTGTGG-3'   |
| H334A                      | 5'-GCGGCTgctGATGTGACCTTCATACCGCTC-3'  | 5'-ATAGAGATACAGCTTCTGTATCTTGTCTGGG-3' |
| D335A                      | 5'-GCGGCTCATgctGTGACCTTCATACCGCTC-3'  | 5'-ATAGAGATACAGCTTCTGTATCTTGTCTGGG-3' |
| A257L                      | 5'-GACAACGTGcttGCCGAGCAGGCACACAAC-3'  | 5'-CAGGAGGATGAAGAAGTCCACTTTATCACT-3'  |
| A257F                      | 5'-GACAACGTGtttGCCGAGCAGGCACACAAC-3'  | 5'-CAGGAGGATGAAGAAGTCCACTTTATCACT-3'  |
| A257W                      | 5'-GACAACGTGtggGCCGAGCAGGCACACAAC-3'  | 5'-CAGGAGGATGAAGAAGTCCACTTTATCACT-3'  |
| S285W                      | 5'-GACACAtggTTGTACATACTGCCAAGGAA-3'   | 5'-CACAGCTCTCTGTTTCGATCATCCTTGCAAA-3' |
| L289W                      | 5'-TACATAtggCCCAAGGAAGACAGGGAAAGT-3'  | 5'-CAAGGATGTGTCCACAGCTCTCTGTTTCGAT-3' |
| Y106F                      | 5'-ttcGACTCTCAATACCATGAGACCACCTG-3'   | 5'-AGGAGAATATGGTTTCGGACCACCAGCTAG-3'  |
| Y110F                      | 5'-TACGACTCTCAAttcCATGAGACCACCTG-3'   | 5'-AGGAGAATATGGTTTCGGACCACCAGCTAG-3'  |
| Y(106,110)F                | 5'-ttcGACTCTCAAttcCATGAGACCACCTG-3'   | 5'-AGGAGAATATGGTTTCGGACCACCAGCTAG-3'  |
| M106-112 (YDSQYHE→AASAAAA) | 5'-gccgctcgccACCACCTGAAGGGGGCATG-3'   | 5'-tgcAGaggcggcAGGAGAATATGGTTTCGG-3'  |
| Δ77-116                    | 5'-GGGGGCATGTTTCTGGGAGCTGACCAAG-3'    | 5'-CCACTCTACCTGCTCCTCCAGCGGGAGCGG-3'  |

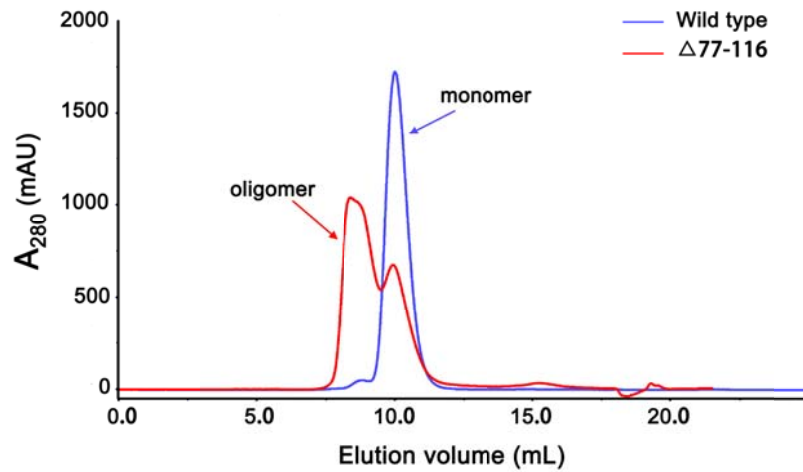**Figure S1** Gel filtration chromatograms indicate the triangular structure (fragment 77-116) keeps ACP6 in its monomeric form in solution.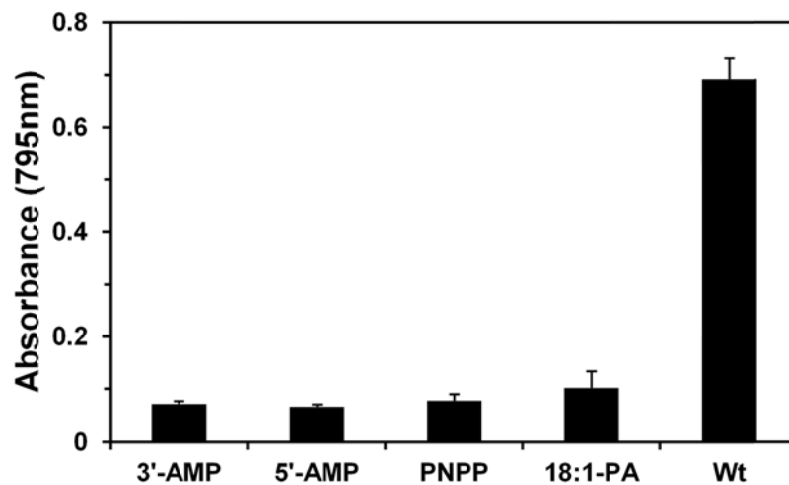**Figure S2** Substrate specificity of ACP6. Error bars represent s.d. (n=3).
